# Supplementary material for: Metabolomics Analysis Reveals Dynamic Accumulation of Sugar and Acid during Stem Development of Brassica juncea
Source: MDPI journal article supplement (doi:10.3390/agronomy12123227), 2022-12-19
Supplement: s1 [file s1]

**Table S1 Sequences of primers used in qPCR**

| Gene         | ID                | Forward primer (5'→3')  | Reverse primer (5'→3')   |
|--------------|-------------------|-------------------------|--------------------------|
| <i>INV</i>   | <i>BjuA037015</i> | AAGGTCTCCTCGCCGTCTCATT  | CGTCGCTGTTTCATCGCTTTTCG  |
| <i>HK</i>    | <i>BjuA019270</i> | CCTTCGCATGTCGCAAGTCTCC  | GCTCGTGATTCTCCGCTACCA    |
| <i>Gmd</i>   | <i>BjuB048743</i> | AGTCGCATACGGTGGAGGAGTT  | CCTTCGCCTTGCTCGCATCT     |
| <i>TSTA3</i> | <i>BjuB039905</i> | GCCGATCCCTGAATCTGCTCTG  | CGCCTCGTGGAACCTCCTCATA   |
| <i>MDH1</i>  | <i>BjuB021247</i> | CTGACCAGCCTGTGATCCTCCA  | TCCTCGGGAAACCACCAACCAT   |
| <i>MDH1</i>  | <i>BjuB001329</i> | CAGACCAGCCTGTGATCCTCCA  | ACCACCAACCATAACCGCAACA   |
| <i>MDH2</i>  | <i>BjuA019013</i> | AGCCCTCACCAAGCGTACTCAA  | ACCTCCTCCACACCGTTCTTCC   |
| <i>MDH2</i>  | <i>BjuB045011</i> | TGTGCTCACCGCTCTCACCAA   | ACCTCCTCCACACCGTTCTTCC   |
| <i>CS</i>    | <i>BjuA033443</i> | GGAGGAGGTGCGAGTGTCTCT   | AGGTAGCAGCAACATCCGTGAA   |
| <i>IDH1</i>  | <i>BjuA045395</i> | GTACCGTGCCACTGATGCTGTT  | GCCATAGCAACACCGCCTTCA    |
| <i>IDH2</i>  | <i>BjuA003018</i> | CAGGAAGAAGGTGACGGCAGTG  | CAGCGATACCAGCAGCAGTGTT   |
| <i>UBC</i>   | <i>BjuA030523</i> | GCCATCACTCAGAGCGTCATCT/ | AAGGAGACTGTGTAGGACCAAGAA |

*INV*: Invertase; *HK*: Hexokinase; *Gmd*: GDP mannose 4,6-dehydratase; *TSTA3*: GDP-L-fucose synthase; *MDH*: Malate dehydrogenase; *CS*: Citrate synthase; *IDH*: Isocitrate dehydrogenase; *UBC*: Ubiquitin C gene
